# Supplementary material
Source: publisher site journal article supplement (https://www.dovepress.com/article/supplementary_file/537984/537984%20Revised%20Supplementary%20Table%201.xlsx)
Supplement: Supplementary file 1 [file 537984%20Revised%20Supplementary%20Table%201.xlsx]

## Sheet: Sheet2
Supplementary Table 1. Detailed demographic and clinical characteristics of the control group.
No.	Gender	Age (years)	History of urolithiasis	Stone Side	Weight (kg)	Height (cm)	BMI (kg/m²)	Stone Size (mm)	Stone Location	Duration of surgery (minutes)	Postoperative hospitalization day	Complication	Difficult Ureter
1	female	61		left	40	154	16.8663	11.7	Renal	60	3
2	male	63		right	40	174	13.2118	12.7	Mid	64	3	Residual Stone
3	female	27		right	44	150	19.5556	5	Distal	18	5	fever
4	female	52	YES	left	45	160	17.5781	7.4	Distal	62	2		YES
5	female	35		right	48	160	18.75	8	Mid	38	2
6	female	38		left	49	160	19.1406	9.6	Prox	60	2
7	female	35		Bilateral	50	150	22.2222	7，10	Mid，Renal	44	3
8	female	66		right	50	155	20.8117	5	Prox	40	3
9	male	66		left	50	163	18.8189	5.8	Prox	36	2
10	female	66		right	50	155	20.8117	3.7	Distal	20	2
11	male	53		left	53	160	20.7031	10	Prox	60	2
12	female	59		right	53	153	22.6409	4.2	Prox	30	2
13	male	69		left	53	165	19.4674	11	Prox	40	2
14	female	43		left	54	163	20.3244	12.2	Renal	80	3		YES
15	female	32		left	55	160	21.4844	8.5	Distal	35	2
16	male	39	YES	left	55	175	17.9592	6.8	Prox	60	2
17	female	54		left	55	158	22.0317	5	Distal	40	2
18	female	61	YES	left	55	162	20.9572	5.8	Prox	38	2
19	female	65		left	55	165	20.202	6.5	Prox	36	3
20	female	69	YES	left	55	155	22.8928	6	Distal	40	3
21	female	71		right	55	158	22.0317	6.8	Mid	27	2
22	female	86		left	55	161	21.2183	17	Prox	50	5
23	male	67		right	56	170	19.3772	3.3	Mid	46	3
24	female	68		left	56	159	22.151	4.7	Prox	42	2
25	female	35		right	56.6	160	22.1094	17	Prox	70	3
26	female	33		right	57	162	21.7193	6.7	Mid	36	2
27	female	51		right	57	162	21.7193	8	Distal	39	2
28	female	69	YES	right	57	160	22.2656	8	Distal	13	3
29	female	62	YES	right	57.5	152	24.8875	5	Distal	34	3
30	female	60	YES	right	58	150	25.7778	5	Mid	50	2
31	female	61		left	58	150	25.7778	6	Mid	30	3
32	female	62		right	58	158	23.2335	14	Prox	75	2
33	male	66	YES	right	58	160	22.6562	5	Prox	55	2
34	male	70		Bilateral	58	164	21.5645	6.2，7.5	Distal，Prox	26	2
35	female	74	YES	right	58	154	24.4561	3.5	Distal	22	3
36	male	75		left	58	159	22.9421	5	Prox	40	3
37	female	77	YES	left	58	150	25.7778	6.7	Mid	45	2
38	male	62		right	59	172	19.9432	8	Distal	18	4
39	female	65		left	59	157	23.9361	10	Prox	50	2
40	female	70		left	59	157	23.9361	6.7	Prox	60	3
41	female	43		right	60	163	22.5827	5.7	Distal	22	2
42	male	50		right	60	174	19.8177	11	Mid	62	2
43	male	54		left	60	170	20.7612	10	Prox	90	3
44	female	58		left	60	163	22.5827	5	Distal	12	3
45	female	60		right	60	158	24.0346	7.2	Prox	70	2
46	female	61		right	60	162	22.8624	6.2	Distal	20	2
47	female	63		right	60	162	22.8624	6	Prox	40	3
48	female	65		left	60	160	23.4375	7	Distal	37	2
49	female	66		right	60	166	21.7738	7.4	Prox	46	3
50	male	67	YES	left	60	168	21.2585	5	Mid	30	1
51	male	70		left	60	164	22.3081	12	Prox	114	2
52	female	73		left	60	162	22.8624	6	Mid	30	2
53	male	77		right	60	176	19.3698	5	Distal	20	4
54	male	80		left	60	160	23.4375	6	Prox	54	3
55	male	27		left	61	178	19.2526	9	Distal	25	2
56	female	27		right	62	160	24.2188	5	Distal	33	2
57	male	43		left	62	165	22.7732	13	Prox	70	2
58	female	44		left	62	162	23.6244	4	Prox	54	2
59	female	58		right	62	155	25.8065	7.6	Distal	30	2
60	female	58		left	62	160	24.2188	10	Prox	45	2
61	male	71		right	62	172	20.9573	7	Prox	40	2
62	male	77		left	62	170	21.4533	5	Prox	35	2
63	female	58		right	62.5	162	23.815	7.2	Mid	40	4	fever
64	female	60		left	62.5	151	27.4111	6	Distal	24	2
65	male	57		left	63	170	21.7993	4.9	Prox	60	2
66	male	72		left	63	167	22.5896	9	Distal	65	3
67	male	71		right	64	173	21.3839	6.6	Mid	39	3
68	female	27		left	65	165	23.8751	6	Prox	64	2
69	male	32		right	65	165	23.8751	10	Prox	29	2
70	male	53	YES	Bilateral	65	170	22.4913	9.6，6.5	Prox，Prox	60	2
71	male	57	YES	right	65	170	22.4913	11	Prox	60	4
72	male	58	YES	left	65	170	22.4913	9.6	Renal	32	2
73	male	60		left	65	175	21.2245	4.6	Prox	35	2
74	male	60		right	65	180	20.0617	5.5	Prox	35	2
75	male	64		right	65	170	22.4913	16	Prox	70	2
76	female	65		left	65	160	25.3906	3.2	Prox	23	2
77	female	67		right	65	166	23.5883	4.8	Prox	30	2
78	male	67		left	65	170	22.4913	8.5	Prox	30	2		YES
79	male	70		right	65	170	22.4913	11	Mid	23	2
80	male	71	YES	right	65	170	22.4913	5	Distal	40	2
81	male	71		left	65	168	23.03	7	Prox	100	4
82	male	77		left	65	170	22.4913	7	Prox	46	3
83	female	78		right	65	164	24.1672	7	Mid	60	4
84	female	39	YES	right	65.5	155	27.2633	7	Mid	51	2		YES
85	male	45		right	66	172	22.3094	7	Prox	30	1		YES
86	female	51	YES	left	66	154	27.8293	3	Prox	42	2
87	male	53		left	66	170	22.8374	5	Prox	18	2		YES
88	female	54		right	66	153	28.1943	8	Mid	19	2
89	male	59		right	66	165	24.2424	10.8	Prox	67	2
90	male	35		right	67	177	21.3859	10	Distal	40	3
91	female	54		left	67	160	26.1719	6.5	Prox	40	2
92	male	57		right	67	165	24.6097	5	Distal	50	2
93	male	72		left	67	172	22.6474	5.9	Mid	36	4
94	female	61		right	67.5	160	26.3672	16	Prox	88	2
95	male	31		left	68	168	24.093	7.5	Prox	30	2
96	female	58		left	68	160	26.5625	15.8	Renal	60	3	Residual Stone
97	male	58		left	68	168	24.093	8	Distal	52	2
98	male	65		Bilateral	68	170	23.5294	8，5.8	Prox，Mid	70	4
99	male	65		right	68	163	25.5937	14	Prox	60	2
100	male	31		left	69	170	23.8754	15.9	Prox	90	4
101	male	37		right	69	180	21.2963	7.3	Prox	86	3
102	male	66	YES	Bilateral	69	173	23.0546	10，8.5	Prox，Prox	62	2
103	female	34		left	70	160	27.3438	7	Prox	34	2
104	male	43		right	70	173	23.3887	8	Prox	40	2		YES
105	male	45		right	70	174	23.1206	5.5	Prox	50	2
106	male	47		right	70	174	23.1206	8	Distal	48	2
107	male	48		Bilateral	70	175	22.8571	6，5.5	Mid，Distal	25	2
108	female	50		right	70	162	26.6728	8	Prox	40	2
109	male	50		left	70	170	24.2215	6	Distal	30	2
110	male	53		right	70	165	25.7117	5.8	Distal	34	2
111	male	56		right	70	165	25.7117	5	Distal	30	2
112	male	59	YES	left	70	161	27.0051	7	Distal	48	5
113	male	61	YES	left	70	170	24.2215	13.5	Distal	40	3
114	male	62		left	70	175	22.8571	10.9	Distal	73	3
115	male	62		left	70	173	23.3887	9	Mid	22	2
116	male	62	YES	right	70	170	24.2215	5.8	Prox	30	2
117	female	63		left	70	164	26.0262	4.1	Distal	15	2
118	male	67		left	70	170	24.2215	6	Prox	52	2
119	female	67		right	70	156	28.764	10.5	Distal	50	2
120	male	67		right	70	173	23.3887	8	Prox	42	2		YES
121	male	67		left	70	165	25.7117	15	Prox	55	2
122	male	68		left	70	168	24.8016	4.9	Prox	18	4	Bleeding	YES
123	male	70		right	70	170	24.2215	8	Prox	50	2
124	female	71		left	70	165	25.7117	8	Prox	40	2
125	female	67		left	71	159	28.0843	9.4	Prox	53	2
126	male	50		left	72	166	26.1286	7	Prox	53	2
127	male	59		right	72	170	24.9135	12	Prox	62	2	Residual Stone
128	male	63		right	72	168	25.5102	7.6	Prox	81	5	fever
129	male	65		right	72	170	24.9135	7	Prox	50	3
130	female	66		right	72	168	25.5102	9	Prox	54	2
131	male	68		left	72	176	23.2438	10	Mid	60	2
132	female	83	YES	right	72	161	27.7767	4	Distal	30	3
133	male	68		right	72.5	169	25.3843	9.5	Mid	60	3
134	male	46		left	73	176	23.5666	5	Distal	32	4
135	male	65		right	73	170	25.2595	5	Prox	24	2
136	female	66		right	73	162	27.8159	8.8	Mid	60	4	Bleeding
137	male	43		left	73.5	173	24.5581	5.9	Prox	41	2
138	male	60		left	74	175	24.1633	7.5	Distal	28	2
139	male	61		left	74	173	24.7252	7	Mid	40	3
140	male	32		right	75	172	25.3515	6	Distal	60	2
141	male	35		right	75	176	24.2123	7.5	Prox	44	1
142	male	37		left	75	168	26.5731	5.6	Prox	35	2
143	male	44		left	75	175	24.4898	6	Distal	17	2
144	male	46		right	75	172	25.3515	8	Prox	40	2
145	male	60	YES	left	75	161	28.9341	6	Prox	45	3
146	male	60		right	75	172	25.3515	9	Prox	70	2		YES
147	female	61	YES	left	75	165	27.5482	8.9	Prox	50	2
148	male	61		right	75	173	25.0593	7	Mid	60	2
149	male	66		left	75	165	27.5482	4.6	Prox	30	2
150	female	66		right	75	156	30.8185	4.6	Distal	30	2
151	male	66		left	75	170	25.9516	5.6	Mid	44	2
152	male	74		left	75	168	26.5731	4.8	Prox	42	2		YES
153	male	76		left	75	168	26.5731	6.8	Mid	60	2
154	male	33		left	77	171	26.3329	12	Renal	49	2
155	male	41	YES	left	77	174	25.4327	9.4	Prox	59	2
156	male	45		left	77	170	26.6436	7.6	Prox	51	2
157	male	51		left	77	176	24.858	7.5	Prox	42	2
158	male	46		right	78	173	26.0617	3.2	Mid	12	2
159	male	67	YES	left	78	174	25.763	8.8	Prox	34	3	Residual Stone
160	male	70		right	78	170	26.9896	11	Prox	63	3
161	male	31		left	80	180	24.6914	8	Mid	60	2
162	male	34		right	80	173	26.7299	6	Distal	20	2
163	male	39		left	80	170	27.6817	6	Mid	25	2
164	male	42		left	80	170	27.6817	11	Distal	43	2
165	female	42		left	80	179	24.968	3	Prox	45	2
166	male	44		right	80	176	25.8264	7.5	Prox	40	2
167	male	45		right	80	177	25.5354	9.3	Mid	30	2
168	male	46	YES	left	80	177	25.5354	11	Distal	60	2
169	male	47		left	80	179	24.968	4	Prox	60	2		YES
170	male	49		left	80	176	25.8264	9.6	Distal	28	3
171	male	55		left	80	175	26.1224	4.5	Prox	30	2
172	male	60		left	80	168	28.3447	11.5	Prox	58	2
173	male	65		right	80	178	25.2493	13	Mid	55	3
174	male	71		right	81	174	26.7539	11	Prox	50	4	Bleeding
175	male	46		Bilateral	82	169	28.7105	9.5，7.6	Prox，Prox	60	2		YES
176	male	63		right	82	169	28.7105	8.5	Prox	38	2
177	male	47		left	83	170	28.7197	10	Prox	60	2
178	male	49		left	83	174	27.4145	9	Prox	41	2
179	male	33		right	85	193	22.8194	5	Distal	26	2		YES
180	male	46		left	85	168	30.1162	12.8	Prox	35	3
181	male	50		left	85	173	28.4005	6	Prox	50	2
182	male	59		left	85	160	33.2031	13	Prox	90	2
183	male	59		right	85.5	177	27.291	5	Mid	40	2		YES
184	male	54		left	87	175	28.4082	6	Mid	95	2
185	male	38	YES	right	87.5	168	31.002	10.6	Prox	61	2
186	male	38		left	88.8	178	28.0268	14	Distal	40	2
187	male	32		left	89	178	28.0899	5	Prox	60	2
188	male	71		right	89	178	28.0899	10.1	Renal	38	2
189	male	40		left	90	180	27.7778	9.4	Prox	60	2
190	male	42		right	90	176	29.0548	6.1	Prox	23	2
191	male	45		left	90	177	28.7274	5.9	Prox	33	2		YES
192	male	60		right	90	172	30.4218	4.2	Prox	45	2
193	male	56		left	92	176	29.7004	2	Distal	62	3
194	male	54		Bilateral	95	176	30.6689	9，7.3	Mid，Prox	110	2
195	male	46		right	98	178	30.9304	5.8	Prox	45	2
196	male	32		left	100	173	33.4124	7	Distal	15	2
197	male	50		right	105	176	33.8972	8	Prox	75	2
198	male	39	YES	right	115	178	36.2959	9	Prox	42	2
199	male	68		right	68	170	23.5294	5	Distal	25	2
200	male	51	YES	right	75	175	24.4898	7	Distal	42	2
	male 134 female 66	Median (IQR) 59 (20)	YES=30 No=170	left=102，right=90，Bilateral=8	Median (IQR) 68.5 (15)	Median (IQR) 169 (11.3)	Median (IQR) 24.2 (3.8)	Median (IQR) 7 (3.6)	Prox=112，Mid=37，Distal=52，Renal=7	Median (IQR) 42.0 (30.0)	Median (IQR) 2.0 (1.0)	Bleeding=3，fever=3，Residual Stone=4	16
